# Supplementary material for: Entamoeba histolytica: Proteomics Bioinformatics Reveal Predictive Functions and Protein–Protein Interactions of Differentially Abundant Membrane and Cytosolic Proteins
Source: MDPI journal article supplement (doi:10.3390/membranes11060376), 2021-05-21
Supplement: s1 [file s1]

Supplementary Materials:

# ***Entamoeba histolytica*: Proteomics bioinformatics revealed predictive functions and protein- protein interactions of differentially abundant membrane and cytosolic protein**

Norhidayah Azmi <sup>1</sup> and Nurulhasanah Othman <sup>1,\*</sup>

<sup>1</sup> Institute for Research in Molecular Medicine (INFORMM), Universiti Sains Malaysia, 11800, Pulau Pinang, Malaysia; hidayah84@student.usm.my

\* Correspondence: nurulhasanah@usm.my

**Citation:** Azmi, N.; Othman, N.

*Entamoeba histolytica*: Proteomics Bioinformatics Reveal Predictive Functions and Protein-Protein Interactions of Differentially Abundant Membrane and Cytosolic Proteins. **2021**, *11*, 376. <https://doi.org/10.3390/membranes11060376>

Academic Editor: Igor Zhukov

Received: 30 March 2021

Accepted: 18 May 2021

Published: 21 May 2021

**Publisher's Note:** MDPI stays neutral with regard to jurisdictional claims in published maps and institutional affiliations.

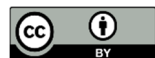

**Copyright:** © 2021 by the authors. Licensee MDPI, Basel, Switzerland. This article is an open access article distributed under the terms and conditions of the Creative Commons Attribution (CC BY) license (<http://creativecommons.org/licenses/by/4.0/>).

**Table S1.** Classification of Increased Abundance Proteins by PANTHER DB (Membrane proteins are bolded)

| Accession Number                        | Gene Name                                              | PANTHER (Family/Subfamily)                                        |
|-----------------------------------------|--------------------------------------------------------|-------------------------------------------------------------------|
| Catalytic Activity (Molecular Function) |                                                        |                                                                   |
| EH1_129750                              | Rho family GTPase                                      | Ras-related protein rac1-related (pthr24072: sf281)               |
| EH1_199590                              | <b>70 kDa heat shock protein putative</b>              | <b>Endoplasmic reticulum chaperone bip (pthr19375: sf144)</b>     |
| EH1_076870                              | <b>3-oxo 5 alpha-steroid 4-dehydrogenase domain</b>    | <b>Sc2 (pthr10556: sf28)</b>                                      |
| EH1_054830                              | <b>Calcium-transporting ATPase</b>                     | <b>Calcium-transporting ATPase (pthr24093: sf369)</b>             |
| EH1_014030                              | <b>NAD(P) transhydrogenase subunit alpha, putative</b> | <b>Nicotinamide nucleotide transhydrogenase (pthr10160: sf19)</b> |
| EH1_054180                              | <b>Protein SEY1 homolog 2</b>                          | <b>Protein sey1 (pthr45923: sf2)</b>                              |
| EH1_200230                              | Cell surface protease gp63 putative                    | Leishmanolysin-like peptidase (pthr10942: sf0)                    |
| Binding (Molecular Function)            |                                                        |                                                                   |
| EH1_129750                              | Rho family GTPase                                      | Ras-related protein rac1-related (pthr24072: sf281)               |
| EH1_199590                              | <b>70 kDa heat shock protein putative</b>              | <b>Endoplasmic reticulum chaperone bip (pthr19375: sf144)</b>     |
| EH1_014030                              | <b>NAD(P) transhydrogenase subunit alpha, putative</b> | <b>Nicotinamide nucleotide transhydrogenase (pthr10160: sf19)</b> |
| EH1_136160                              | Calreticulin putative                                  | Calreticulin (pthr11073: sf2)                                     |
| EH1_139030                              | <b>EhSyntaxin 1A (Fragment)</b>                        | <b>Syntaxin-1a (pthr19957: sf41)</b>                              |
| EH1_021410                              | <b>EhSyntaxin B</b>                                    | <b>Ld23667p (pthr19957: sf38)</b>                                 |
| EH1_175460                              | 60S acidic ribosomal protein                           | 60s acidic ribosomal protein p0 (pthr45699: sf3)                  |
| Accession Number                        | Gene Name                                              | PANTHER (Family/Subfamily)                                        |
| Cellular Process (Biological Process)   |                                                        |                                                                   |
| EH1_078310                              | Uncharacterized protein                                | Protein yippee-like (pthr14255: sf3)                              |
| EH1_129750                              | Rho family GTPase                                      | Ras-related protein rac1-related (pthr24072: sf281)               |
| EH1_065790                              | Rab family GTPase                                      | Ld44762p (pthr47980: sf24)                                        |

|                                     |                                                     |                                                            |
|-------------------------------------|-----------------------------------------------------|------------------------------------------------------------|
| EH1_199590                          | 70 kDa heat shock protein putative                  | Endoplasmic reticulum chaperone bip (pthr19375: sf144)     |
| EH1_076870                          | 3-oxo 5 alpha-steroid 4-dehydrogenase domain-contai | Sc2 (pthr10556: sf28)                                      |
| EH1_014030                          | NAD(P) transhydrogenase subunit alpha, putative     | Nicotinamide nucleotide transhydrogenase (pthr10160: sf19) |
| EH1_136160                          | Calreticulin putative                               | Calreticulin (pthr11073: sf2)                              |
| EH1_139030                          | EhSyntaxin 1A (Fragment)                            | Syntaxin-1a (pthr19957: sf41)                              |
| EH1_054180                          | Protein SEY1 homolog 2                              | Protein sey1 (pthr45923: sf2)                              |
| EH1_021410                          | EhSyntaxin B                                        | Ld23667p (pthr19957: sf38)                                 |
| EH1_175460                          | 60S acidic ribosomal protein                        | 60s acidic ribosomal protein p0 (pthr45699: sf3)           |
| Cell/Cell Part (Cellular Component) |                                                     |                                                            |
| EH1_078310                          | Uncharacterized protein                             | Protein yippee-like (pthr14255: sf3)                       |
| EH1_129750                          | Rho family GTPase                                   | Ras-related protein rac1-related (pthr24072: sf281)        |
| EH1_065790                          | Rab family GTPase (Fragment)                        | Ld44762p (pthr47980: sf24)                                 |
| EH1_199590                          | 70 kDa heat shock protein putative                  | Endoplasmic reticulum chaperone bip (pthr19375: sf144)     |
| EH1_076870                          | 3-oxo 5 alpha-steroid 4-dehydrogenase domain-contai | Sc2 (pthr10556: sf28)                                      |
| EH1_014030                          | NAD(P) transhydrogenase subunit alpha, putative     | Nicotinamide nucleotide transhydrogenase (pthr10160: sf19) |
| EH1_136160                          | Calreticulin putative                               | Calreticulin (pthr11073: sf2)                              |
| EH1_139030                          | EhSyntaxin 1A (Fragment)                            | Syntaxin-1a (pthr19957: sf41)                              |
| EH1_054180                          | Protein SEY1 homolog 2                              | Protein sey1 (pthr45923: sf2)                              |

**Table S2.** Classification of decreased abundance proteins by PANTHER DB.

| Mapped ID  | Gene Name/ Symbol                    | PANTHER<br>(Family/Subfamily)                                           |
|------------|--------------------------------------|-------------------------------------------------------------------------|
|            |                                      | Binding / Cellular Process / Cell Part                                  |
| EH1_052860 | Heat shock protein 70 putative       | Ribosome-associated molecular chaperone ssb1-related (pthr19375: sf395) |
| EH1_125840 | Peptidyl-prolyl cis-trans isomerase  | Peptidyl-prolyl cis-trans isomerase d-related (pthr1107: sf380)         |
| EH1_166810 | Elongation factor 2                  | Elongation factor 2 (pthr42908: sf10)                                   |
| EH1_104630 | Filamin 2 putative                   | Zgc:100997 (pthr19961: sf58)                                            |
| EH1_198930 | Actin putative                       | Actin-related protein 3b (pthr11937: sf31)                              |
| EH1_192450 | Rho family GTPase                    | Ras-related protein rac1-related (pthr24072: sf281)                     |
| EH1_146180 | Rho family GTPase                    | Ras-related protein rac1-related (pthr24072: sf281)                     |
| EH1_176140 | Profilin                             | Profilin (pthr11604: sf0)                                               |
| EH1_174180 | Skp1 family protein                  | S-phase kinase-associated protein 1 (pthr11165: sf24)                   |
| EH1_147570 | Rho GDP exchange inhibitor, putative | Ld16419p (pthr10980: sf3)                                               |
| EH1_091250 | Arp2/3 complex 34 kDa subunit        | Actin-related protein 2/3 complex subunit 2 (pthr12058: sf0)            |
| EH1_005020 | F-actin-capping protein subunit beta | F-actin-capping protein subunit beta (pthr10619: sf0)                   |
